# Supplementary material
Source: ML conference proceedings conference paper supplement (https://openreview.net/forum?id=jc1wIiBtNk)
Supplement: supplementary_material [file Non_Uniform_Bandit_Learning.pdf › Non_Uniform_Bandit_Learning.pdf]

---

# Non-Uniform Multiclass Learning with Bandit Feedback

---

Anonymous Author(s)

Affiliation

Address

email

## Abstract

1 We study the problem of multiclass learning with bandit feedback in both the  
2 i.i.d. batch and adversarial online models. In the *uniform* learning framework,  
3 it is well known that no hypothesis class  $\mathcal{H}$  is learnable in either model when  
4 the effective number of labels is unbounded. In contrast, within the *universal*  
5 learning framework, recent works by Hanneke et al. [2025b] and Hanneke et al.  
6 [2025a] have established surprising exact equivalences between learnability under  
7 bandit feedback and full supervision in both the i.i.d. batch and adversarial online  
8 models, respectively. This raises a natural question: What happens in the *non-*  
9 *uniform* learning framework, which lies between the uniform and universal learning  
10 frameworks? Our contributions are twofold: (1) We provide a combinatorial  
11 characterization of learnable hypothesis classes in both models, in the realizable  
12 and agnostic settings, within the non-uniform learning framework. Notably, this  
13 includes elementary and natural hypothesis classes, such as a countably infinite  
14 collection of constant functions over some domain that is learnable in both models.  
15 (2) We construct a hypothesis class that is non-uniformly learnable under full  
16 supervision in the adversarial online model (and thus also in the i.i.d. batch model),  
17 but not non-uniformly learnable under bandit feedback in the i.i.d. batch model  
18 (and thus also not in the adversarial online model). This serves as our main  
19 novel technical contribution that reveals a fundamental distinction between the  
20 non-uniform and universal learning frameworks.

## 21 1 Introduction

22 Learnability lies at the core of learning theory. Intuitively, it explores the conditions under which  
23 there exists an algorithm that can accurately predict unseen instances based on a finite set of examples.  
24 To rigorously study this phenomenon, various abstract learning frameworks, including uniform,  
25 non-uniform, and universal learning frameworks, have been proposed in the literature so far. This  
26 manuscript focuses on the non-uniform learning framework.

27 The classical work of Benedek and Itai [1988] introduced the non-uniform learning framework.  
28 Moreover, they gave a combinatorial characterization of non-uniform PAC learnability for the binary  
29 classification setting. The recent contribution of Lu [2024] gave a combinatorial characterization of  
30 non-uniform online learnability also for the binary classification setting. However, many important  
31 tasks involve a large prediction space. For instance, consider a quantum experiment with  $n \in \mathbb{N}$   
32 qubits, where the goal is to predict measurement outcomes, each of which can be one of  $2^n$  possible  
33 states. Meanwhile, many significant tasks involve bandit feedback, where the only information  
34 that can be received is whether the prediction is correct. For example, a physicist might propose a  
35 prediction based on a discovered law of nature and then observe only whether it holds true.

36 In response, we consider the framework called “Non-Uniform Multiclass Learning under Bandit  
 37 Feedback”. Roughly speaking, in this framework, a learner aims to infer an unknown hypothesis  $h^*$   
 38 from a known hypothesis class  $\mathcal{H}$  consisting of functions from some instance space  $\mathcal{X}$  (e.g., space of  
 39 images) to some label space  $\mathcal{Y}$  (e.g., categories of images), through an interaction with nature, with a  
 40 guarantee that may depend on  $h^*$ .

41 Subsequently, we provide a more precise, yet still informal, description of the framework. In the  
 42 i.i.d. batch model, nature initially selects an unknown data distribution similar to classical multiclass  
 43 learning, but the learner does not directly observe the correct labels of the i.i.d. training examples.  
 44 Instead, during each round, the learner first receives an unlabeled example, makes a prediction for  
 45 its label, and receives bandit feedback. Despite this restriction, the goal remains the same as in  
 46 classical multiclass PAC learning, where the primary objective is to output a function that correctly  
 47 classifies most future examples generated by the same underlying data distribution. In addition, in  
 48 the adversarial online model, during each round, nature first presents an instance to the learner. Next,  
 49 the learner must predict a label for the given instance. After making a prediction, nature reveals the  
 50 bandit feedback. Crucially, this setting differs from the full supervision setting, where, at the end of  
 51 each round, the true label is revealed by nature. Again, despite this restriction, the goal remains the  
 52 same as in classical multiclass online learning, where the primary objective is to correctly predict  
 53 in most rounds. Furthermore, in the realizable setting, we assume that the data distribution or the  
 54 sequence of instance-label pairs played by the adversary is consistent with some  $h^* \in \mathcal{H}$ . On the  
 55 other hand, in the agnostic setting, we do not make such an assumption. Moreover, the non-uniform  
 56 learning framework allows for error or regret bounds, possibly depending on  $h^*$ , in the i.i.d. batch  
 57 and adversarial online models, respectively.

58 In this manuscript, our first main contribution is to algorithmically addressing the following question  
 59 in the non-uniform multiclass learning under bandit feedback framework across both the i.i.d. batch  
 60 and adversarial online models, in both the realizable and agnostic settings:

61 *What is the necessary and sufficient condition for a hypothesis class  $\mathcal{H} \subseteq \mathcal{Y}^{\mathcal{X}}$  that admits*  
 62 *non-uniform learnability?*

63 In particular, we provide a combinatorial characterization of hypothesis classes for which learnability  
 64 is possible. We note that, for simplicity at this stage of the introduction, several details about the  
 65 definitions in the framework have been omitted, such as the possibility of allowing randomized  
 66 learners in the adversarial online model. For more details, see subsection 1.1 and section 3.

67 Previous research on the problem of multiclass learning under bandit feedback mostly considered  
 68 the *uniform* learning framework. In essence, the uniform learning framework seeks a theoretical  
 69 guarantee that is true for all data distributions or all adversarial sequences, without any dependence on  
 70 the distribution or sequence itself. This line of study was initiated by the seminal work of Daniely et al.  
 71 [2011] and continued by Erez et al. [2024b,a] in the PAC model, and by Daniely and Helbertal [2013],  
 72 Long [2017], Geneson [2021], Raman et al. [2023], Hanneke and Yang [2023] in the adversarial  
 73 online model. If the effective label space is infinite—that is, there exists at least one instance in  
 74 the instance space for which hypotheses in the hypothesis class can assign infinitely many distinct  
 75 labels—no deterministic online learning algorithm can guarantee a *uniformly* bounded number of  
 76 mistakes against the worst-case realizable adversary. To see this, consider a scenario in which the  
 77 adversary repeatedly selects the same specific instance in every round. In this case, the predictions  
 78 of the online learning algorithm can be consistently incorrect, even though a hypothesis within the  
 79 hypothesis class remains consistent with all previous feedback. In particular, this happens because the  
 80 feedback received only indicates whether the prediction was correct or not. Moreover, this conclusion  
 81 can be easily generalized to randomized algorithms as well. In addition, a similar limitation arises in  
 82 the PAC model due to the need to guess an unknown natural number while keeping the number of  
 83 guesses uniformly bounded over the choices of the target number. Notably, this limitation applies  
 84 even to elementary and natural hypothesis classes, such as a countably infinite collection of constant  
 85 functions over some domain.

86 The recent contributions by Hanneke et al. [2025b] and Hanneke et al. [2025a] are the only works  
 87 that diverge from the uniform learning framework by considering the universal learning framework  
 88 of Bousquet et al. [2021]. This framework enables the study of theoretical guarantees that are still  
 89 true for all data distributions or all adversarial sequences, but crucially *without placing a uniform*  
 90 *bound* on the error rate in the i.i.d. batch model or regret in the adversarial online model. In particular,  
 91 the error rate may depend on the distribution itself, and the number of mistakes may depend on the

infinite sequence of instance-label pairs. These works demonstrated surprising exact equivalences between learnability under bandit feedback and full supervision in the i.i.d. batch and adversarial online models, respectively. As a result, it is possible to learn the hypothesis class of a countably infinite collection of constant functions over some domain in the universal multiclass learning under bandit feedback framework in both i.i.d. batch and adversarial online models as opposed to the uniform learning framework.

This raises a natural question: what happens in the *non-uniform* learning framework, which lies between the uniform and universal learning frameworks? In particular, in the former, learnability is essentially impossible under bandit feedback, whereas in the latter, there is an exact equivalence between learnability under full supervision and learnability under bandit feedback.

The non-uniform learning framework also allows one to escape the aforementioned theoretical limitation in the uniform learning framework. To illustrate this, we again focus on the hypothesis class of countably infinite constant functions over some domain. Suppose that we are in the adversarial online model and in the realizable setting. Now, consider the following online learning algorithm: In each round  $i \in \mathbb{N}$ , it predicts the label  $i$  unless it receives feedback confirming the prediction is correct, once the correct label is identified, it consistently predicts that label in all subsequent rounds. This online learning algorithm makes a finite number of mistakes, depending on  $h^*$ , against any realizable adversary. It is not hard to see that this class is non-uniform online learnable in the agnostic setting as well as non-uniform PAC learnable in both realizable and agnostic settings. However, we construct a hypothesis class that is non-uniformly learnable under full supervision in the adversarial online model (and thus also in the i.i.d. batch model), but not non-uniformly learnable under bandit feedback in the i.i.d. batch model (and thus also not in the adversarial online model). This serves as our main novel technical contribution that reveals a fundamental distinction between the non-uniform and universal learning frameworks.

To summarize, our main contributions in the current manuscript are as follows. Therefore, we complete the picture of the problem of multiclass learning.

- We provide a combinatorial characterization of hypothesis classes that are non-uniformly multiclass learnable under bandit feedback in both PAC and adversarial online models, in the realizable and the agnostic settings, in section 4 and section 5, respectively.
- In addition, we provide a combinatorial characterization of hypothesis classes that are non-uniformly multiclass learnable under full supervision in both PAC and adversarial online models, in the realizable and agnostic settings, in Appendix D and Appendix E, respectively. This generalizes the results of Benedek and Itai [1988] and Lu [2024] to the multiclass setting.
- We construct a hypothesis class that is non-uniformly learnable under full supervision in the adversarial online model (and thus also in the i.i.d. batch model), but not non-uniformly learnable under bandit feedback in the PAC model (and thus also not in the adversarial online model), in Appendix C.
- We give two examples of hypothesis classes to show other separations between uniform, non-uniform, and universal learning frameworks for the problems of multiclass learning under bandit feedback and full supervision Appendix C.

## 1.1 Overview of the Main Results

In the following subsection, we provide a detailed summary of the key results and findings presented in our paper.

### 1.1.1 Non-Uniform Multiclass Online Learning

We define the problem as a repeated game between the learner and the adversary. At each round  $t \in \mathbb{N}$ , the adversary selects an instance  $X_t$  from an arbitrarily non-empty instance space  $\mathcal{X}$  and a label  $Y_t$  from a possibly countably infinite non-empty label space  $\mathcal{Y}$ <sup>1</sup>; then, reveals  $X_t$  to the learner. Subsequently, the learner predicts a (potentially randomized) label  $\hat{Y}_t$  from  $\mathcal{Y}$ . Following this, the

<sup>1</sup>If we consider randomized learning algorithms, the associated  $\sigma$ -algebra is of little consequence, except that singleton sets  $\{y\}$  should be measurable.

141 learner receives feedback. If we are in the full supervision setting, the feedback is  $Y_t$ ; and if we are in  
 142 the bandit feedback setting, the feedback is  $\mathbb{I}\{\hat{Y}_t \neq Y_t\}$ , only indicating whether the prediction is  
 143 correct. Following standard learning theory conventions, we define a hypothesis class  $\mathcal{H}$  as a set of  
 144 functions from  $\mathcal{X}$  to  $\mathcal{Y}$ . This class is known to the learner before the game begins. For additional  
 145 details, see section 3.

146 In the realizable setting, we assume that the sequence  $\{(X_t, Y_t)\}_{t=1}^\infty$ , chosen by the adversary, is  
 147 consistent with at least one hypothesis in  $\mathcal{H}$ . In this setting, we focus on the standard notion of the  
 148 expected number of mistakes made by the learner over time. We say that a hypothesis class  $\mathcal{H} \subseteq \mathcal{Y}^\mathcal{X}$   
 149 is realizable non-uniform multiclass online learnable under bandit feedback if there exists an online  
 150 learning rule  $\mathbf{A}$  receiving bandit feedback setting's feedback such that for every  $h^* \in \mathcal{H}$  there exists  
 151 a constant  $c \in \mathbb{N}$  such that for every sequence  $\{(X_t, Y_t)\}_{t=1}^\infty$  consistent with  $h^*$ , the online learning  
 152 algorithm  $\mathbf{A}$  only makes  $c$  number of mistakes in expectation. We have a similar definition for the  
 153 full supervision setting. See section 3 for further details. The main result of this part is the following  
 154 theorem.

155 **Theorem 1.1.** *Let  $\mathcal{H} \subseteq \mathcal{Y}^\mathcal{X}$  be a hypothesis class. Then, the following statements are equivalent.*

- 156 •  *$\mathcal{H}$  can be represented as a countable union of hypothesis classes with finite bandit Littlestone*  
 157 *dimension.*
- 158 •  *$\mathcal{H}$  is realizable non-uniform multiclass online learnable under bandit feedback.*

159 To prove the upper bound of the above theorem, we design a novel online learning algorithm called  
 160 the non-uniform bandit standard optimal algorithm. Furthermore, the proof of the lower bound is  
 161 based on the original work of Benedek and Itai [1988]. As an immediate implication, consider the  
 162 hypothesis class of a countably infinite collection of constant functions over some domain. Indeed,  
 163 one can view each hypothesis in this class as part of the countable union of hypothesis classes with  
 164 finite bandit Littlestone dimension. Thus, this hypothesis class is realizable non-uniform multiclass  
 165 online learnable under bandit feedback. See subsection 5.1 for further details. Notably, we also prove  
 166 a similar theorem for the full supervision setting. The proof of this theorem is based on the arguments  
 167 of the recent work of Lu [2024]. See Appendix E for further details.

168 In the agnostic setting, we make no assumptions about the sequence  $\{(X_t, Y_t)\}_{t=1}^\infty$ , chosen by the  
 169 adversary. In this setting, our focus shifts to minimizing the standard notion of expected regret, which  
 170 compares the expected number of mistakes made by the learner to those made by the best hypothesis  
 171 in the hypothesis class  $\mathcal{H}$  over the sequence. We say that the hypothesis class  $\mathcal{H} \subseteq \mathcal{Y}^\mathcal{X}$  is agnostic  
 172 non-uniform multiclass online learnable under bandit feedback if there exists an online learning rule  
 173  $\mathbf{A}$  receiving bandit feedback setting's feedback such that for every  $h^* \in \mathcal{H}$  there exists a constant  
 174  $c \in \mathbb{N}$  such that for every  $T \in \mathbb{N}$  and every sequence  $\{(X_t, Y_t)\}_{t=1}^T$ , the online learning algorithm  $\mathbf{A}$   
 175 has  $o(cT)$  expected regret. We have a similar definition for the full supervision setting. See section 3  
 176 for further details. The main result of this part is the following theorem.

177 **Theorem 1.2.** *Let  $\mathcal{H} \subseteq \mathcal{Y}^\mathcal{X}$  be a hypothesis class. Then, the following statements are equivalent.*

- 178 •  *$\mathcal{H}$  can be represented as a countable union of hypothesis classes with finite bandit Littlestone*  
 179 *dimension.*
- 180 •  *$\mathcal{H}$  is agnostic non-uniform multiclass online learnable under bandit feedback.*

181 To establish the upper bound of the above theorem, we comprise several components. First, we prove  
 182 a structural lemma for bandit Littlestone classes. Second, we adopt the technique from the original  
 183 work of Benedek and Itai [1988]. Third, we use an ingredient from the recent work of Raman et al.  
 184 [2023]. Finally, we employ the standard doubling trick. As an immediate implication, again consider  
 185 the hypothesis class of a countably infinite collection of constant functions over some domain. Based  
 186 on a similar argument as before, this hypothesis class is agnostic non-uniform multiclass online  
 187 learnable under bandit feedback. See subsection B.1 for further details, including the exact rate,  
 188 which is  $\tilde{O}(\sqrt{T})$ . Notably, we also prove a similar theorem for the full supervision setting. The proof  
 189 of this theorem is similar to the proof of Theorem 1.2. See Appendix E for further details.

## 190 1.1.2 Non-Uniform Multiclass PAC Learning

191 Here, initially, nature selects an unknown data distribution  $\mathcal{D}$  over  $\mathcal{X} \times \mathcal{Y}$ . Fix a sample size  $n \in \mathbb{N}$ .  
 192 Subsequently, the learner and nature interact sequentially in  $n$  rounds. In particular, during each

round  $t \in \{1, 2, \dots, n\}$ , nature first independently samples an example  $(x_t, y_t) \sim \mathcal{D}$  and reveals  $x_t$  to the learner. The learner is then tasked with predicting  $\hat{y}_t \in \mathcal{Y}$  for the received instance. Upon the learner's prediction, nature only reveals whether the prediction is correct. Eventually, the learner must output a function from instance space to label space that correctly classifies most future examples generated by the same unknown data distribution. Roughly speaking this is called PAC learnability. Again, following standard learning theory conventions, we consider a hypothesis class  $\mathcal{H}$ , consisting of functions mapping  $\mathcal{X}$  to  $\mathcal{Y}$ . We assume standard measurability assumptions on  $\mathcal{X}$  and  $\mathcal{C}$  as well. We say that a data distribution  $\mathcal{D}$  is realizable by a hypothesis class  $\mathcal{H}$  if there exists  $h^* \in \mathcal{H}$  such that the samples are consistent with it almost surely. For additional details, see section 3.

**Theorem 1.3.** *Let  $\mathcal{H} \subseteq \mathcal{Y}^{\mathcal{X}}$  be a hypothesis class. Then, the following statements are equivalent.*

- $\mathcal{H}$  can be represented as a countable union of hypothesis classes with finite effective label space and finite Natarajan dimension.
- $\mathcal{H}$  is realizable non-uniform multiclass PAC learnable under bandit feedback.
- $\mathcal{H}$  is agnostic non-uniform multiclass PAC learnable under bandit feedback.

To prove the above theorem, we generalize the argument of the work of Benedek and Itai [1988] for the binary classification setting under full supervision using the results of Daniely et al. [2011] on PAC learnability under bandit feedback. As an immediate implication, consider the hypothesis class of a countably infinite collection of constant functions over some domain. Indeed, one can view each hypothesis in this class as part of the countable union of hypothesis classes with finite effective label space and finite Natarajan dimension. Thus, this hypothesis class is realizable non-uniform multiclass online learnable under bandit feedback. See section 4 for further details. Notably, we also prove a similar theorem for the full supervision setting. See Appendix D for further details.

### 1.1.3 Examples

We present three examples of hypothesis classes that demonstrate the separation between related learnability notions. Formally, we have the following results.

**Proposition 1.4.** *There exists a hypothesis class  $\mathcal{H} \subseteq \mathcal{Y}^{\mathcal{X}}$  that is uniform multiclass online learnable under full supervision, but not non-uniform multiclass PAC learnable under bandit feedback.*

The above proposition reveals a fundamental distinction between the non-uniform and universal learning frameworks, where in later we have surprising exact equivalences between multiclass learnability under bandit feedback and full supervision. Indeed, if a hypothesis class is uniform multiclass online learnable under full supervision, it is also uniform multiclass PAC learnable under full supervision, non-uniform multiclass online learnable under full supervision, and non-uniform multiclass PAC learnable under full supervision. In addition, if a hypothesis class is not non-uniform multiclass PAC learnable under bandit feedback, it is not also non-uniform multiclass online learnable under bandit feedback, uniform multiclass PAC learnable under bandit feedback, and uniform multiclass online learnable under bandit feedback. As a result, our theorem is stated in the most extreme case.

This serves as our main novel technical contribution. To prove it, the idea is as follows: Let  $\mathcal{X}$  be the set of all non-empty countable sequences of distinct real numbers. Also, let  $\mathcal{Y} = \mathbb{N} \cup \{\star\}$ . In addition, let  $\mathcal{H} = \{h_y \mid h_y : \mathcal{X} \rightarrow \mathcal{Y}, y \in \mathbb{R}, \forall S \in \mathcal{X} \ h_y(S) = \star \text{ if } y \text{ isn't in the sequence } S; \text{ otherwise } h_y(S) = i, \text{ where } S[i] = y\}$ . The crucial observation that we prove is that any countable representation of this class contains a class with infinite effective label space.

**Proposition 1.5.** *There exists a hypothesis class  $\mathcal{H}_1 \subseteq \mathcal{Y}^{\mathcal{X}}$  that is universal multiclass online learnable under bandit feedback, but not non-uniform multiclass PAC learnable under full supervision. Also, there exists a hypothesis class  $\mathcal{H}_2 \subseteq \mathcal{Y}^{\mathcal{X}}$  that is non-uniform multiclass online learnable under bandit feedback but not uniform multiclass PAC learnable under full supervision.*

The above proposition demonstrates a separation between uniform, non-uniform, and universal learning frameworks, particularly under bandit feedback and full supervision.

## 2 Related Work

**PAC Learning.** The Probably Approximately Correct (PAC) learning framework, introduced by Valiant [1984], has been a cornerstone in the field of statistical learning theory. Blumer et al. [1989], Vapnik and Chervonenkis [2015], Valiant [1984], Vapnik [2006] characterizes learnable classes within the binary PAC learning framework in the realizable setting via a combinatorial parameter called the VC dimension. This result was later extended to the agnostic setting by Haussler [1992]. Since then, PAC learning has been extensively studied in various learning theoretic settings.

**Online Learning.** Online learning has been a subject of study for over half a century. The seminal work of Littlestone [1988] marked the beginning of its formal exploration within the computer science community. Since then, online learning has been studied across diverse settings, including learning under bandit feedback Daniely et al. [2011], Daniely and Helbertal [2013], Long [2017], Geneson [2021], Raman et al. [2023], Hanneke and Yang [2023]. Additionally, it is closely linked to a wide set of fundamental problems, such as differential privacy, as explored in Alon et al. [2019], Bun et al. [2020], Alon et al. [2022]. Given its foundational nature, it is not surprising that online learning has also found many practical applications.

**Bandit Feedback.** The bandit setting plays a pivotal role in statistical decision-making. Its conceptual foundation was first established by Thompson [1933]. Later, the field was popularized by the mathematician and statistician Herbert Robbins, whose seminal work Robbins [1952] introduced the multi-armed bandit problem. In recent years, bandit scenarios have attracted substantial attention, driven by foundational contributions such as Auer et al. [2002a,b]. For a comprehensive review of the literature, the reader may refer to the recent work of Foster et al. [2021].

**Multiclass Learning.** A substantial body of theoretical research has explored multiclass classification in various frameworks, with notable contributions from Natarajan and Tadepalli [1988], Natarajan [1989], Ben-David et al. [1992], Haussler and Long [1995], Rubinstein et al. [2006], Daniely et al. [2011, 2012], Daniely and Shalev-Shwartz [2014], Bruckhim et al. [2021]. However, a combinatorial characterization of multiclass classification within Valiant’s PAC learning framework, particularly when the number of labels is unbounded, remained unresolved until recently, even in the realizable setting. This gap was addressed in the seminal work of Bruckhim et al. [2022], which also extended to the agnostic setting as well David et al. [2016]. The study of multiclass classification with unbounded label spaces is motivated by several factors. First, in multiclass settings, it is preferable for guarantees to remain independent of the number of labels, even when finite. Second, mathematical frameworks involving infinity mostly provide clearer insights.

## 3 Notations, Definitions, and Preliminaries

In this section, we provide the model setting and formal definition of the problem. We first provide the PAC learning model as follows.

**PAC Learning.** In this paper, we investigate the PAC learning with bandit feedback, which is defined in the work of Daniely et al. [2011], in a non-uniform setting. Formally,  $\mathcal{X}$  is a non-empty *instance space* and  $\mathcal{Y}$  is a non-empty *label space*.  $\mathcal{H} \subseteq \mathcal{Y}^{\mathcal{X}}$  is the hypothesis class, which is a non-empty set of functions from  $\mathcal{X}$  to  $\mathcal{Y}$ . In this paper, we focus on learning under the 0-1 loss. In other words, the loss function is  $\mathbb{I}[y \neq y']$  defined in  $\mathcal{Y} \times \mathcal{Y}$  and  $\mathbb{I}[\cdot]$  is the indicator function. For a distribution  $\mathcal{D}$  over  $\mathcal{X} \times \mathcal{Y}$ , we define the error of a concept  $h$  with respect to the distribution  $\mathcal{D}$  as  $\text{err}_{\mathcal{D}}(h) = \Pr_{(x,y) \sim \mathcal{D}}[h(x) \neq y]$ . We also denote  $\text{err}_{\mathcal{D}}(\mathcal{H}) = \inf_{h \in \mathcal{H}} \text{err}_{\mathcal{D}}(h)$ . A learning algorithm  $\mathbf{A}$  under this setting is a function  $\mathbf{A} : \cup_{n=1}^{\infty} (\mathcal{X} \times \mathcal{Y})^n \rightarrow \mathcal{Y}^{\mathcal{X}}$ . It takes multiple samples, i.i.d. sampled from distribution  $\mathcal{D}$ ,  $S_m$ , then outputs a concept  $\hat{h}$ . For the PAC learning with bandit feedback version, we first generate multiple samples, i.i.d. sampled from distribution  $\mathcal{D}$ , then the learner sees the instance sequence without labels and makes a prediction for each instance. After that, whether this prediction is correct is sent to the learner as feedback. Then the learner can use that information to output the concept  $\hat{h}$ . To unify the definitions, we also use  $S_m$  to stand for the samples and feedback in the bandit feedback setting.

If there is a concept  $h \in \mathcal{H}$ , such that  $\text{err}_{\mathcal{D}}(h) = 0$ , we say the distribution  $\mathcal{D}$  is realizable by  $\mathcal{H}$ . Then we can define the non-uniform PAC learnability as follows.

**Definition 3.1** (Non-Uniform PAC Learnability). If for every  $h^* \in \mathcal{H}$ , there is a number  $m(h^*, \epsilon, \delta)$ , such that for every  $m > m(h^*, \epsilon, \delta)$ , we have  $\Pr_{S_m \sim \mathcal{D}^m}[\text{err}_{\mathcal{D}}(\mathbf{A}(S_m)) > \epsilon] \leq \delta$ . We say  $\mathcal{H}$  is non-uniform  $(\epsilon, \delta)$ -PAC learnable.

Then similarly, for the agnostic case,

**Definition 3.2** (Agnostic Non-Uniform PAC Learnability). If for every  $h^* \in \mathcal{H}$ , there is a number  $m(h^*, \epsilon, \delta)$ , such that for every  $m > m(h^*, \epsilon, \delta)$ , we have  $\Pr_{S_m \sim \mathcal{D}^m}[\text{err}_{\mathcal{D}}(\mathbf{A}(S_m)) > \text{err}_{\mathcal{D}}(\mathcal{H}) + \epsilon] \leq \delta$ . We say  $\mathcal{H}$  is agnostic non-uniform  $(\epsilon, \delta)$ -PAC learnable.

Then, we provide the model setting of online learning.

**Online Learning.** In this paper, we investigate multiclass online learning in a non-uniform setting. Here, the definition of  $\mathcal{X}$ ,  $\mathcal{Y}$  and  $\mathcal{H}$  keeps the same as previous. We also focus on the 0-1 loss in this setting.  $X = \{X_t\}_{t \in \mathbb{N}}$  is a sequence of instances and  $Y = \{Y_t\}_{t \in \mathbb{N}}$  is a sequence of labels.

Online learning is a sequential game between the learner and the adversary. In round  $t$ , the adversary reveals an instance  $X_t$  to the learner and the learner makes a prediction  $\hat{Y}_t$  based on the history  $(X_{\leq t-1}, \tilde{Y}_{\leq t-1}) = \{(X_i, \tilde{Y}_i)\}_{i \leq t-1}$ , where  $\tilde{Y}_i$  is the feedback given to the learner. After that, the adversary gives the learner feedback  $\tilde{Y}_t$  of its prediction, which may be used to inform future predictions. In this paper, we focus on two types of feedback: *full supervision* and *bandit feedback*. In the full supervision setting, the learner receives the true label  $Y_t$  of the instance  $X_t$  and incurs a loss  $\mathbb{I}[Y_t \neq \hat{Y}_t]$ . In the bandit feedback setting, the learner only receives the loss  $\mathbb{I}[Y_t \neq \hat{Y}_t]$  and does not observe the true label  $Y_t$ .

In the realizable setting, the adversary chooses a concept  $h^* \in \mathcal{H}$ , which is unknown to the learner, and generates the labels  $Y_t = h^*(X_t)$ . The learner aims to minimize the cumulative number of mistakes,

$$M_{\mathbf{A}}(h^*, X, T) := \sum_{t=1}^T \mathbb{I}[\hat{Y}_t \neq h^*(X_t)].$$

We use  $M_{\mathbf{A}}(h^*, X)$  to stand for  $M_{\mathbf{A}}(h^*, X, \infty)$ .

Unlike the classic online learning problem, we aim to build a mistake bound for each concept instead of a uniform mistake bound for the whole concept class. Formally speaking,

**Definition 3.3** (Non-uniform Online Learnability). We say a concept class  $\mathcal{H}$  is non-uniform online learnable in the realizable setting, if there exists an online learning algorithm  $\mathbf{A}$ , such that

$$\exists m : \mathcal{H} \rightarrow \mathbb{N}, \forall h^* \in \mathcal{H}, \forall X, M_{\mathbf{A}}(h^*, X) \leq m(h^*).$$

In the agnostic setting, we release the restriction that the adversary chooses a target concept from the concept class. Instead, the adversary can choose any sequence of labels  $Y \in \mathcal{Y}^\infty$ . In this case, we use the notion of *regret* to measure the performance of the learner. The regret of the learner compared to a concept  $h^*$  is defined as the difference between the total loss of the learner and the total loss of the function  $h^*$ . Formally speaking,

$$\text{regret}_{\mathbf{A}}(h^*, X, Y, T) := \mathbb{E} \left[ \sum_{t=1}^T \mathbb{I}[\hat{Y}_t \neq Y_t] - \sum_{t=1}^T \mathbb{I}[h^*(X_t) \neq Y_t] \right].$$

**Remark.** Here the expectation is taken over the randomness of the learner. We do not need to consider the randomized learner for the realizable cases.

Then, we can define online learnability in the agnostic setting as follows.

**Definition 3.4** (Agnostic Non-Uniform Online Learnability). We say a concept class  $\mathcal{H}$  is agnostic non-uniform online learnable, if there exists an online learning algorithm  $\mathbf{A}$ , such that

$$\begin{aligned} &\exists m : \mathcal{H} \times \mathbb{N} \rightarrow \mathbb{N}, m(h^*, T) = o(T), \\ &\forall h^* \in \mathcal{H}, \forall X, \text{ and } \forall Y, \text{ regret}_{\mathbf{A}}(h^*, X, Y, T) \leq m(h^*, T). \end{aligned}$$

We introduce several useful combinatorial dimensions to describe our characterization in Appendix A.

## 4 PAC Learning

In this section, we investigate the non-uniform PAC multiclass learning with bandit feedback. Basically, we combine the tools from the work of Benedek and Itai [1988] and the work of Daniely et al. [2011] to get a non-uniform PAC learner for the bandit feedback setting.

First, we have the following property of the Natarajan dimension and the size of the effective label space. The proof appears in Appendix B.

**Lemma 4.1.** *If  $\mathcal{H}_1$  has the size of effective label space  $k_1$  and  $d_N(\mathcal{H}_1) = d_1$ , and  $\mathcal{H}_2$  has the size of effective label space  $k_2$  and  $d_N(\mathcal{H}_2) = d_2$ . Let  $\mathcal{H} = \mathcal{H}_1 \cup \mathcal{H}_2$ , the size of the effective label space of  $\mathcal{H}$  is at most  $k_1 + k_2$  and  $d_N(\mathcal{H}) \leq (d_1 + d_2)^2 + 1$ .*

In addition, in order to prove the main theorem in this section, Theorem 1.3, we need the following a result from [Daniely et al., 2011] Theorem B.1 that also appears in Appendix B. Now, we prove the main result.

*Proof of Theorem 1.3.* In this proof, we provide a way to transform a uniform PAC learning algorithm to a non-uniform PAC learning algorithm. As this method can be used to realizable algorithms and agnostic algorithms, we use the realizable case as an example in the proof.

First, we show that if  $\mathcal{H}$  is non-uniform PAC learnable,  $\mathcal{H}$  can be represented as a countable union of hypothesis classes with finite effective label space and Natarajan dimension. By definition, for every  $h^* \in \mathcal{H}$ , there is a number  $m(h^*, \epsilon, \delta)$ , such that if we have more than that number of samples, we can learn that concept. Therefore, by taking  $\epsilon = \frac{1}{100}$  and  $\delta = \frac{1}{100}$ , we can set the following concept classes:

$$\mathcal{H}_i = \{h^* : m(h^*, \frac{1}{100}, \frac{1}{100}) \leq i\}$$

For every  $i$ , we know that there is a learning algorithm which only takes finite samples and can learn  $h \in \mathcal{H}_i$  with  $\epsilon = \frac{1}{100}$  and  $\delta = \frac{1}{100}$ . Due to Theorem B.1, we know  $\mathcal{H}_i$  has finite Natarajan dimension and finite size of effective label space. And also we know that for every  $h \in \mathcal{H}$ , there is an  $i$ ,  $h \in \mathcal{H}_i$ , thus,  $\mathcal{H} = \bigcup_i \mathcal{H}_i$ .

Then we show how to non-uniformly learn a concept class  $\mathcal{H}$  if it is a countable union of hypothesis classes with finite effective label space and Natarajan dimension. Assume  $\mathcal{H} = \bigcup_i \mathcal{H}_i$ . Due to Lemma 4.1, we assume the size of effective label space of  $\bigcup_{i=1}^j \mathcal{H}_i$  is  $k_j$  and  $d_N(\bigcup_{i=1}^j \mathcal{H}_i) = d_j$ . Then we describe the non-uniform learning algorithm. If we are given  $m$  samples, compute the largest  $j$ , such that  $m \geq k_j \cdot j(d_j \log k_j \cdot \ln j + \ln j)$ , then we run the uniform learner on  $\bigcup_{i=1}^j \mathcal{H}_i$  with  $m$  samples, if there is a concept consistent with all samples, output it. Otherwise, output a prescribed concept  $h_0$ .

Then we show the algorithm works. For every concept  $h^* \in \mathcal{H}$ , we know there is a  $j$  such that  $h^* \in \mathcal{H}_j$ . According to the algorithm above, we have  $m(h^*, \epsilon, \delta) = O(k_{j'} \cdot j'(d_{j'} \log k_{j'} \cdot \ln j' + \ln j'))$ , where  $j' = \max j, \frac{1}{\epsilon}, \frac{1}{\delta}$ .

That finishes the proof.  $\square$

## 5 Adversarial Online Learning

### 5.1 Realizable Setting

In this section, we investigate the non-uniform online multiclass learning in the realizable setting. By using the generic non-uniform learning algorithm and the bandit standard optimal algorithm (BSOA) from the work of Daniely et al. [2011], we prove that a concept class  $\mathcal{H}$  is non-uniform online learnable if and only if it can be represented as a countable union of bandit Littlestone classes.

*Proof of Theorem 1.1.* We first prove that if  $\mathcal{H}$  can be represented as a countable union of bandit Littlestone classes, then  $\mathcal{H}$  is non-uniform online learnable with bandit feedback by using the following generic non-uniform online learning algorithm (Algorithm 1). Recall the result from the work of Daniely et al. [2011] that if a concept class  $\mathcal{H}$  has  $\text{BLdim}(\mathcal{H}) = d$ , the BSOA has a mistake bound of  $d$ . Then we can prove that Algorithm 1 has a mistake bound of  $m(h^*)$  is  $O((k + d_k)^2)$ ,



---

**Algorithm 1** Generic Non-uniform Online Learning Algorithm

---

```
1: Input: A concept class  $\mathcal{H} = \bigcup_{n \in \mathbb{N}^+} \mathcal{H}_n$  with  $d_n = \text{BLdim}(\mathcal{H}_n) < \infty, \forall n \in \mathbb{N}^+$ .  
2: Initialize a BSOA  $\mathbf{A}_n$  for each bandit Littlestone class  $\mathcal{H}_n$ , and number of mistakes for each  
   algorithm  $e_n = 0$ .  
3: for  $t = 1, 2, \dots$  do  
4:   Receive instance  $X_t$ .  
5:   Compute  $J_t = \arg \min_n \{e_n + n\}$ .  
6:   Predict  $\hat{Y}_t$  as  $\mathbf{A}_{J_t}$ .  
7:   Receive feedback  $\mathbb{I}[Y_t \neq \hat{Y}_t]$ .  
8:   if  $\mathbb{I}[Y_t \neq \hat{Y}_t] = 1$  then  
9:      $e_{J_t} = e_{J_t} + 1$ .  
10:  end if  
11: end for
```

---

378 if  $h^* \in \mathcal{H}_k$  and  $\text{BLdim}(\mathcal{H}_k) = d_k$ . Notice that for all  $t$ ,  $J_t + e_{J_t} \leq k + d_k$ . Also, notice that the  
379 number of mistakes made by Algorithm1 is equal to the sum of the number of mistakes made by each  
380  $\mathbf{A}_n$ . That is,

$$M_A(h^*, X) = \sum_{i=1}^{\infty} e_i = \sum_{i=1}^{k+d_k} e_i + \sum_{i=k+d_k+1}^{\infty} e_i \leq (k + d_k)^2 + 0 = (k + d_k)^2.$$

381 That finishes the proof.

382 We then prove that if  $\mathcal{H}$  is non-uniform online learnable with bandit feedback, then  $\mathcal{H}$  can be  
383 represented as a countable union of bandit Littlestone classes. Because  $\mathcal{H}$  is non-uniform online  
384 learnable with bandit feedback, there exists an online learning algorithm  $\mathbf{A}$  such that for all  $h^* \in \mathcal{H}$ ,  
385  $M_A(h^*, X) \leq m(h^*)$ . Then we can define

$$\mathcal{H}_n = \{h \in \mathcal{H} : m(h) = n\}.$$

386 Because  $\mathcal{H}$  is non-uniform online learnable with bandit feedback, we know that for every  $h \in \mathcal{H}$ ,  
387  $m(h)$  is finite, and we can assume that the learning algorithm is  $\mathbf{A}$ . Thus,  $\mathcal{H} = \bigcup_{n \in \mathbb{N}} \mathcal{H}_n$ . We then  
388 prove that  $\mathcal{H}_n$  is a bandit Littlestone class. In order to do this, we need the result from the work of  
389 Daniely et al. [2011] that any deterministic algorithm makes at least  $\text{BLdim}(\mathcal{H})$  mistakes against the  
390 worst adversary for concept class  $\mathcal{H}$ . Notice that for any concept  $h^* \in \mathcal{H}_n$ ,  $\mathbf{A}$  can learn it with at  
391 most  $n$  mistakes, thus,  $\text{BLdim}(\mathcal{H}_n) \leq n$ . Therefore,  $\mathcal{H}_n$  is a bandit Littlestone class. That finishes  
392 the proof.  $\square$

393 We provide the results for the agnostic setting, which is more technical in Appendix B.

## 394 6 Conclusion, Discussion, and Future Directions

395 In this manuscript, we study the fundamental problem of multiclass learning under bandit feedback  
396 when the number of labels can be unbounded within the non-uniform learning framework in both  
397 PAC and online models, in the realizable and the agnostic settings. We have shown a first theoretical  
398 result in this context, stating that PAC learnability is possible if and only if the hypothesis class can  
399 be represented as a countable union of classes with finite effective label space and finite Natarajan  
400 dimension, and online learnability is possible if and only if the hypothesis class can be represented as  
401 a countable union of classes with finite bandit Littlestone dimension. This includes elementary and  
402 natural hypothesis classes, such as the class of a countably infinite collection of constant functions  
403 over some domain, which is not learnable in the uniform learning framework. In addition, we  
404 provide a construction of a hypothesis class that is uniform online learnable under full supervision  
405 but not non-uniform PAC learnable under bandit feedback. This implies a key distinction between  
406 the non-uniform and universal learning frameworks.

407 At this point, we outline a suggestion for future research. We believe exploring alternative forms of  
408 feedback beyond bandit feedback in multiclass learning within the non-uniform learning framework  
409 is an avenue for future research. Do we have such a difference between uniform, non-uniform, and  
410 universal learning frameworks in any of them?

## References

- Noga Alon, Roi Livni, Maryanthe Malliaris, and Shay Moran. Private pac learning implies finite littlestone dimension. In *Proceedings of the 51st Annual ACM SIGACT Symposium on Theory of Computing*, pages 852–860, 2019.
- Noga Alon, Mark Bun, Roi Livni, Maryanthe Malliaris, and Shay Moran. Private and online learnability are equivalent. *ACM Journal of the ACM (JACM)*, 69(4):1–34, 2022.
- Patrick Assouad. Densité et dimension. *Annales de l’Institut Fourier*, 33(3):233–282, 1983. doi: 10.5802/aif.938. URL <https://www.numdam.org/articles/10.5802/aif.938/>.
- Peter Auer, Nicolo Cesa-Bianchi, and Paul Fischer. Finite-time analysis of the multiarmed bandit problem. *Machine learning*, 47:235–256, 2002a.
- Peter Auer, Nicolo Cesa-Bianchi, Yoav Freund, and Robert E Schapire. The nonstochastic multiarmed bandit problem. *SIAM journal on computing*, 32(1):48–77, 2002b.
- Shai Ben-David, Nicolo Cesa-Bianchi, and Philip M Long. Characterizations of learnability for classes of  $\{0, \dots, n\}$ -valued functions. In *Proceedings of the fifth annual workshop on Computational learning theory*, pages 333–340, 1992.
- Shai Ben-David, Dávid Pál, and Shai Shalev-Shwartz. Agnostic online learning. In *COLT*, volume 3, page 1, 2009.
- Gyora M Benedek and Alon Itai. Nonuniform learnability. In *Automata, Languages and Programming: 15th International Colloquium Tampere, Finland, July 11–15, 1988 Proceedings 15*, pages 82–92. Springer, 1988.
- Anselm Blumer, Andrzej Ehrenfeucht, David Haussler, and Manfred K Warmuth. Learnability and the vapnik-chervonenkis dimension. *Journal of the ACM (JACM)*, 36(4):929–965, 1989.
- Olivier Bousquet, Steve Hanneke, Shay Moran, Ramon van Handel, and Amir Yehudayoff. A theory of universal learning. In *Proceedings of the 53rd Annual ACM SIGACT Symposium on Theory of Computing*, pages 532–541, 2021.
- Nataly Brukhim, Elad Hazan, Shay Moran, Indraneel Mukherjee, and Robert E Schapire. Multiclass boosting and the cost of weak learning. *Advances in Neural Information Processing Systems*, 34: 3057–3067, 2021.
- Nataly Brukhim, Daniel Carmon, Irit Dinur, Shay Moran, and Amir Yehudayoff. A characterization of multiclass learnability, 2022.
- Mark Bun, Roi Livni, and Shay Moran. An equivalence between private classification and online prediction. In *2020 IEEE 61st Annual Symposium on Foundations of Computer Science (FOCS)*, pages 389–402. IEEE, 2020.
- Amit Daniely and Tom Helbertal. The price of bandit information in multiclass online classification. In *Conference on Learning Theory*, pages 93–104. PMLR, 2013.
- Amit Daniely and Shai Shalev-Shwartz. Optimal learners for multiclass problems. In *Conference on Learning Theory*, pages 287–316. PMLR, 2014.
- Amit Daniely, Sivan Sabato, Shai Ben-David, and Shai Shalev-Shwartz. Multiclass learnability and the erm principle. In *Proceedings of the 24th Annual Conference on Learning Theory*, pages 207–232. JMLR Workshop and Conference Proceedings, 2011.
- Amit Daniely, Sivan Sabato, and Shai Shwartz. Multiclass learning approaches: A theoretical comparison with implications. *Advances in Neural Information Processing Systems*, 25, 2012.
- Ofir David, Shay Moran, and Amir Yehudayoff. Supervised learning through the lens of compression. *Advances in Neural Information Processing Systems*, 29, 2016.
- Liad Erez, Alon Cohen, Tomer Koren, Yishay Mansour, and Shay Moran. Fast rates for bandit pac multiclass classification. *arXiv preprint arXiv:2406.12406*, 2024a.

457 Liad Erez, Alon Cohen, Tomer Koren, Yishay Mansour, and Shay Moran. The real price of bandit  
458 information in multiclass classification. *arXiv preprint arXiv:2405.10027*, 2024b.

459 Dylan J Foster, Sham M Kakade, Jian Qian, and Alexander Rakhlin. The statistical complexity of  
460 interactive decision making. *arXiv preprint arXiv:2112.13487*, 2021.

461 Jesse Geneson. A note on the price of bandit feedback for mistake-bounded online learning. *Theoret-*  
462 *ical Computer Science*, 874:42–45, 2021.

463 Steve Hanneke and Liu Yang. Bandit learnability can be undecidable. In *The Thirty Sixth Annual*  
464 *Conference on Learning Theory*, pages 5813–5849. PMLR, 2023.

465 Steve Hanneke, Shay Moran, Vinod Raman, Unique Subedi, and Ambuj Tewari. Multiclass online  
466 learning and uniform convergence. In *The Thirty Sixth Annual Conference on Learning Theory*,  
467 pages 5682–5696. PMLR, 2023.

468 Steve Hanneke, Amirreza Shaeiri, and Hongao Wang. For universal multiclass online learning, bandit  
469 feedback and full supervision are equivalent. In *36th International Conference on Algorithmic*  
470 *Learning Theory (ALT 2025)*, 2025a.

471 Steve Hanneke, Amirreza Shaeiri, and Qian Zhang. Universal rates for multiclass learning with  
472 bandit feedback. In *38th Annual Conference on Learning Theory (COLT 2025)*, 2025b.

473 David Haussler. Decision theoretic generalizations of the pac model for neural net and other learning  
474 applications. *Information and computation*, 100(1):78–150, 1992.

475 David Haussler and Philip M Long. A generalization of sauer’s lemma. *Journal of Combinatorial*  
476 *Theory, Series A*, 71(2):219–240, 1995.

477 Nick Littlestone. Learning quickly when irrelevant attributes abound: A new linear-threshold  
478 algorithm. *Machine learning*, 2:285–318, 1988.

479 Philip M Long. New bounds on the price of bandit feedback for mistake-bounded online multiclass  
480 learning. In *International Conference on Algorithmic Learning Theory*, pages 3–10. PMLR, 2017.

481 Zhou Lu. When is inductive inference possible? In *The Thirty-eighth Annual Conference on Neural*  
482 *Information Processing Systems*, 2024.

483 Balas K Natarajan. On learning sets and functions. *Machine Learning*, 4:67–97, 1989.

484 Balas K Natarajan and Prasad Tadepalli. Two new frameworks for learning. In *Machine Learning*  
485 *Proceedings 1988*, pages 402–415. Elsevier, 1988.

486 Ananth Raman, Vinod Raman, Unique Subedi, and Ambuj Tewari. Multiclass online learnability  
487 under bandit feedback, 2023.

488 Herbert E. Robbins. Some aspects of the sequential design of experiments. *Bulletin of the American*  
489 *Mathematical Society*, 58:527–535, 1952.

490 Benjamin Rubinstein, Peter Bartlett, and J Rubinstein. Shifting, one-inclusion mistake bounds and  
491 tight multiclass expected risk bounds. *Advances in Neural Information Processing Systems*, 19,  
492 2006.

493 William R Thompson. On the likelihood that one unknown probability exceeds another in view of  
494 the evidence of two samples. *Biometrika*, 25(3-4):285–294, 1933.

495 Leslie G Valiant. A theory of the learnable. *Communications of the ACM*, 27(11):1134–1142, 1984.

496 Vladimir Vapnik. *Estimation of dependences based on empirical data*. Springer Science & Business  
497 Media, 2006.

498 Vladimir N Vapnik and A Ya Chervonenkis. On the uniform convergence of relative frequencies of  
499 events to their probabilities. In *Measures of complexity: festschrift for alexey chervonenkis*, pages  
500 11–30. Springer, 2015.

## A Combinatorial Complexity Parameters

In this paper, we define  $\mathcal{H}|_S = \{(y_1, \dots, y_n) : \exists h \in \mathcal{H}, \forall i \leq n, y_i = h(x_i)\}$ , where  $S = (x_1, \dots, x_n)$ .

**Definition A.1** (Pseudo-cube[Brukhim et al., 2022]). A class  $\mathcal{H} \subseteq \mathcal{Y}^d$  is called a *pseudo-cube* of dimension  $d$  if it is non-empty, finite and for every  $h \in \mathcal{H}$  and  $i \in [d]$ , there is an  $i$ -neighbor  $g \in \mathcal{H}$  of  $h$  (i.e.,  $g(i) \neq h(i)$  and  $g(j) = h(j)$  for all  $j \neq i$ ).

**Definition A.2** (DS dimension [Daniely and Shalev-Shwartz, 2014]). We say that  $S \in \mathcal{X}^n$  is *DS-shattered* by  $\mathcal{H} \subseteq \mathcal{Y}^d$  if  $\mathcal{H}|_S$  contains an  $n$ -dimensional pseudo-cube. The DS dimension  $d_{DS}(\mathcal{H})$  is the maximum size of a DS-shattered sequence.

**Definition A.3** (Natarajan dimension [Natarajan, 1989]). We say that  $S \in \mathcal{X}^n$  is *N-shattered* by  $\mathcal{H} \subseteq \mathcal{Y}^d$  if there exist  $f, g : [n] \rightarrow \mathcal{Y}$  such that for every  $i \in [n]$  we have  $f(i) \neq g(i)$ , and

$$\mathcal{H}|_S \supseteq \{f(1), g(1)\} \times \{f(2), g(2)\} \times \dots \times \{f(n), g(n)\}.$$

The Natarajan dimension  $d_N(\mathcal{H})$  is the maximum size of an N-shattered sequence.

**Definition A.4** (Multiclass Littlestone Tree and Littlestone Dimension [Daniely et al., 2011]). A *multiclass Littlestone tree* for a concept class  $\mathcal{H}$  is a perfect binary tree with depth  $d \leq \infty$ . The internal nodes of that tree are labeled with elements of  $\mathcal{X}$  and the edges connecting a node and its two children are labeled by two different labels from  $\mathcal{Y}$ , so that each finite path emanating from the root is consistent with a concept  $h \in \mathcal{H}$ . (Meaning that for each non-leaf node on the path, the concept  $h$  labels the corresponding element of  $\mathcal{X}$  with the label of the edge the path follows from that node.)

We say the Littlestone dimension of a concept class  $\mathcal{H}$ ,  $\text{Ldim}(\mathcal{H}) = d$ , if there exists a multiclass Littlestone tree of depth  $d$  shattered by  $\mathcal{H}$ , but there is no multiclass Littlestone tree of depth  $d + 1$  shattered by  $\mathcal{H}$ .

**Definition A.5** (Bandit Littlestone Tree and Bandit Littlestone Dimension [Daniely et al., 2011]). A *bandit Littlestone tree* (BL-tree for brevity) for a concept class  $\mathcal{H}$  is a perfect tree  $T$ , with depth  $d < \infty$ . The internal nodes of that tree are labeled with elements of  $\mathcal{X}$  and the edges connecting a node and its children are labeled with elements of  $\mathcal{Y}$ , without repetition. By saying a tree “perfect”, we mean that for every element  $y \in \mathcal{Y}$ , there exists an edge labeled  $y$ . We say that a BL tree  $T$  is shattered by a concept class  $\mathcal{H}$ , if for every path  $P$  from the root to any leaf of  $T$ , there exists a concept  $h \in \mathcal{H}$  such that for every internal node  $v$  in  $P$ ,  $h(x_v)$  is not equal to the label of the edge connecting  $v$  and its child.

The bandit Littlestone dimension of a concept class  $\mathcal{H}$ ,  $\text{BLdim}(\mathcal{H}) = d$ , if there exists a bandit Littlestone tree of depth  $d$  for  $\mathcal{H}$ , but there is no bandit Littlestone tree of depth  $d + 1$  for  $\mathcal{H}$ .

If a concept class  $\mathcal{H}$  has a finite (bandit) Littlestone dimension, we call it a (bandit) Littlestone class.

## B Remaining Proofs

*Proof of Lemma 4.1.* First, it is obvious that the size of the effective label space of  $\mathcal{H}$  is smaller than or equal to  $k_1 + k_2$ , because otherwise, there is a function  $h \in \mathcal{H}$  and a instance  $x$  such that  $h(x) \neq h'(x)$  for every  $h' \in \mathcal{H}_1$  and  $h' \in \mathcal{H}_2$ . Here is an obvious contradiction.

Then we prove the statement about Natarajan dimension by contradiction. Suppose  $d_N(\mathcal{H}) > (d_1 + d_2)^2 + 1$ . Thus, we have a sequence  $S = (x_1, x_2, \dots, x_{(d_1+d_2)^2+1}, x_{(d_1+d_2)^2+2})$  that is N-shattered by  $\mathcal{H}$ . Therefore, there are at least  $2^{(d_1+d_2)^2+2}$  different label sequences in the intersection of  $\mathcal{H}|_S$  and  $\{y_1^0, y_1^1\} \times \{y_2^0, y_2^1\} \times \dots \times \{y_{(d_1+d_2)^2+2}^0, y_{(d_1+d_2)^2+2}^1\}$ , where  $y_i^0 \neq y_i^1$  for all  $i$ .

However, there are at most  $\binom{(d_1+d_2)^2+2}{\leq d_1}$  different label sequences in the intersection of  $\mathcal{H}_1|_S$  and  $\{y_1^0, y_1^1\} \times \{y_2^0, y_2^1\} \times \dots \times \{y_{(d_1+d_2)^2+2}^0, y_{(d_1+d_2)^2+2}^1\}$ , and there are at most  $\binom{(d_1+d_2)^2+2}{\leq d_2}$  different label sequences in the intersection of  $\mathcal{H}_2|_S$  and  $\{y_1^0, y_1^1\} \times \{y_2^0, y_2^1\} \times \dots \times \{y_{(d_1+d_2)^2+2}^0, y_{(d_1+d_2)^2+2}^1\}$ .

Notice that  $\binom{(d_1+d_2)^2+2}{\leq d_1} + \binom{(d_1+d_2)^2+2}{\leq d_2} \leq ((d_1 + d_2)^2 + 2)^{d_1} + ((d_1 + d_2)^2 + 2)^{d_2} < 2^{(d_1+d_2)^2+2}$ . Therefore, it is a contradiction.  $\square$

**Theorem B.1** ([Daniely et al., 2011]). Let  $\mathcal{H} \subseteq \mathcal{Y}^{\mathcal{X}}$  be a hypothesis class.  $\mathcal{H}$  is uniformly PAC learnable with bandit feedback, if and only if  $\mathcal{H}$  has finite Natarajan dimension and finite size of effective label space. More specifically, if the size of the effective label space of  $\mathcal{H}$  is  $k$ . Then,

$$m_b^r(\epsilon, \delta) = O\left(k \cdot \frac{d_N(\mathcal{H}) \log k \cdot \ln\left(\frac{1}{\epsilon}\right) + \ln\left(\frac{1}{\delta}\right)}{\epsilon}\right) \text{ and } m_b^a(\epsilon, \delta) = O\left(k \cdot \frac{d_N(\mathcal{H}) \log k + \ln\left(\frac{1}{\delta}\right)}{\epsilon^2}\right).$$

Here,  $m_b^r(\epsilon, \delta)$  is the number of samples required for the realizable case, and  $m_b^a(\epsilon, \delta)$  is the number of samples required for the agnostic case.

## B.1 Agnostic Setting

In this section, we discuss the result for the agnostic setting. We use the uniform online multiclass learning algorithm with bandit feedback from the work of Raman et al. [2023] to design a non-uniform online learning algorithm with bandit feedback. We then prove that a concept class  $\mathcal{H}$  is non-uniform online learnable in the agnostic setting if and only if it can be represented as a countable union of bandit Littlestone classes. Formally,

**Theorem B.2.** The following two statements are equivalent:

- $\mathcal{H}$  is non-uniform online learnable with bandit feedback in the agnostic setting.
- $\mathcal{H}$  can be represented as a countable union of bandit Littlestone classes.

In order to prove this theorem, we need the following theorem from the work of Raman et al. [2023]:

**Theorem B.3** ([Raman et al., 2023], Theorem 2). For any  $\mathcal{H} \subseteq \mathcal{Y}^{\mathcal{X}}$ , there exists an agnostic online learner whose expected regret, under bandit feedback, is at most

$$8\sqrt{\text{Ldim}(\mathcal{H})\text{BLdim}(\mathcal{H})T \log T}.$$

To simplify this upper bound, we want to show  $\text{Ldim}(\mathcal{H}) \leq \text{BLdim}(\mathcal{H})$  for all  $\mathcal{H}$ . This is true because we can transfer a Littlestone tree to a bandit Littlestone tree using the following method. For each node  $v$  in the Littlestone tree, if its two children are  $v_1$  and  $v_2$  and the label of the two edges are  $y_1$  and  $y_2$ , we can create a node  $v$  in the bandit Littlestone tree and then add nodes  $v_y$  for every  $y \in \mathcal{Y}$  and label edge  $(v, v_y)$  with  $y$ . Then we label  $v_{y_1} = v_1$  and  $v_{y_2} = v_2$ , for other  $y \in \mathcal{Y}$ , we label  $v_y = v_1$ . Then we can prove that this bandit Littlestone tree can be shattered by  $\mathcal{H}$ . Thus, we have  $\text{Ldim}(\mathcal{H}) \leq \text{BLdim}(\mathcal{H})$  for all  $\mathcal{H}$ . Therefore, the regret bound for the agnostic online learner with bandit feedback is upper bounded by  $8\text{BLdim}(\mathcal{H})\sqrt{T \log T}$ .

Then we need the following lemma:

**Lemma B.4.** If  $\text{BLdim}(\mathcal{H}_1) = d_1$ ,  $\text{BLdim}(\mathcal{H}_2) = d_2$ ,  $\text{BLdim}(\mathcal{H}_1 \cup \mathcal{H}_2) \leq d_1 + d_2 + 2$ .

*Proof.* Suppose for sake of contradiction that  $\text{BLdim}(\mathcal{H}_1 \cup \mathcal{H}_2) \geq d_1 + d_2 + 3$ . Then there exists a bandit Littlestone tree  $T$  of depth  $d_1 + d_2 + 3$  that can be shattered by  $\mathcal{H}_1 \cup \mathcal{H}_2$ . Then consider all subtrees at depth  $d_1 + 1$ , all of those subtrees have depth  $d_2 + 2$ . Then because the bandit Littlestone dimension of  $\mathcal{H}_2$  is  $d_2$ , the version space at the root of the subtree must contain some  $h \in \mathcal{H}_1$ . Therefore, the subtree from the root to every node at the depth  $d_1 + 1$  can be shattered by  $\mathcal{H}_1$ , which contradicts the fact that  $\text{BLdim}(\mathcal{H}_1) = d_1$ . That finishes the proof.  $\square$

Then we can use the above lemmas and theorems to prove Theorem B.2.

*Proof of Theorem B.2.* We first show that if  $\mathcal{H}$  can be represented as a countable union of bandit Littlestone classes, then  $\mathcal{H}$  is non-uniform online learnable with bandit feedback in the agnostic setting. First, as  $\mathcal{H}$  can be represented as a countable union of bandit Littlestone classes, we can represent it as the following way:  $\mathcal{H} = \bigcup_{i=1}^{\infty} \mathcal{H}_i$ , such that  $\text{BLdim}(\bigcup_{i=1}^k \mathcal{H}_i) \leq k$ . Then we can use the doubling trick to handle the changing time horizon. Set  $T_k = \sum_{j=1}^k 2^{j-1}$ , then run the non-uniform online learning algorithm with bandit feedback in the agnostic setting with reference concept class  $\bigcup_{i=1}^k \mathcal{H}_i$  in the time slot  $[T_k, T_{k+1}]$ .

Then we analyze this algorithm **A**, notice that for every  $h^*$ , there is a  $k$ , such that  $h^* \in \mathcal{H}_k$ . In the meanwhile, by using Theorem B.3, we can get a regret bound for each time slot. Thus, we can compute the regret of the algorithm as follows:

$$\begin{aligned}
& \text{regret}_{\mathbf{A}}(h^*, X, Y, T) \\
&= \mathbb{E} \left[ \sum_{t=1}^T \mathbb{I}[\hat{Y}_t \neq Y_t] - \sum_{t=1}^T \mathbb{I}[h^*(X_t) \neq Y_t] \right] \\
&= \sum_{j=1}^{\log T} \mathbb{E} \left[ \sum_{t=T_j+1}^{T_{j+1}} \mathbb{I}[\hat{Y}_t \neq Y_t] - \sum_{t=T_j+1}^{T_{j+1}} \mathbb{I}[h^*(X_t) \neq Y_t] \right] \\
&\leq T_k + \sum_{j=k}^{\lfloor \log T \rfloor} \mathbb{E} \left[ \sum_{t=T_j+1}^{T_{j+1}} \mathbb{I}[\hat{Y}_t \neq Y_t] - \mathbb{I}[h^*(X_t) \neq Y_t] \right] \\
&+ \mathbb{E} \left[ \sum_{t=T_{\lfloor \log T \rfloor}+1}^T \mathbb{I}[\hat{Y}_t \neq Y_t] - \mathbb{I}[h^*(X_t) \neq Y_t] \right] \\
&\leq T_k + \sum_{j=k}^{\lfloor \log T \rfloor} 8\text{BLdim} \left( \bigcup_{i=1}^j \mathcal{H}_i \right) \sqrt{j 2^j} \\
&+ 8\text{BLdim} \left( \bigcup_{i=1}^{\lfloor \log T \rfloor+1} \mathcal{H}_i \right) \sqrt{(T-2^{\lfloor \log T \rfloor}) \log(T-2^{\lfloor \log T \rfloor})} \\
&= T_k + \sum_{j=k}^{\lfloor \log T \rfloor} 8j \sqrt{j 2^j} \\
&+ 8(\lfloor \log T \rfloor + 1) \sqrt{(T-2^{\lfloor \log T \rfloor}) \log(T-2^{\lfloor \log T \rfloor})} \\
&\leq T_k + 8(\lfloor \log T \rfloor)^{\frac{5}{2}} \sqrt{2^{\lfloor \log T \rfloor+1}} + 8(\lfloor \log T \rfloor + 1)^{\frac{3}{2}} \sqrt{T} \\
&\leq T_k + 8(\lfloor \log T \rfloor + 1)^{\frac{5}{2}} \sqrt{T}
\end{aligned}$$

Notice that  $T_k$  is a constant related to  $h^*$ , thus, we have  $m(h^*, T) = O(\sqrt{T \log^5 T})$ , which is  $o(T)$ . Therefore, this algorithm is a non-uniform online learning algorithm with bandit feedback in the agnostic setting.

Then we need to prove that if  $\mathcal{H}$  cannot be represented as a countable union of bandit Littlestone classes, no non-uniform online learning algorithm with bandit feedback can learn  $\mathcal{H}$  in the agnostic setting. It is equivalent to prove that if  $\mathcal{H}$  cannot be represented as a countable union of bandit Littlestone classes, no non-uniform online learning algorithm with bandit feedback can learn  $\mathcal{H}$  with a  $o(T)$  mistake bound, that is, for all  $h^* \in \mathcal{H}$ ,  $m(h^*, T) = o(T)$ . We prove the contrapositive of this statement. In other words, if there is a non-uniform online learner **A** for a concept class  $\mathcal{H}$  with mistake bound  $o(T)$ ,  $\mathcal{H}$  can be represented as a countable union of bandit Littlestone classes. By definition, we define

$$\mathcal{H}_i = \{h \in \mathcal{H} : \forall X, \forall T \geq i, \mathbb{E}[\mathbf{M}_{\mathbf{A}}(h, X, T)] \leq \frac{T}{3}\}.$$

Notice that  $i \in \mathbb{N}$  and  $\mathcal{H} = \bigcup_{i=1}^{\infty} \mathcal{H}_i$ . Define  $C_i = \sup_x |\{h(x) : h \in \mathcal{H}_i\}|$ . Then refer to the Lemma 18 in the work of Raman et al. [2023] and notice that we have  $\mathbb{E}[\mathbf{M}_{\mathbf{A}\mathbf{A}}(h, X, T)] \leq \frac{T}{3}$  for all  $T \geq i$  and all  $X$ . Thus, by taking  $T = i$ , we have the following two inequalities:

$$\begin{aligned}
\frac{i}{3} &\geq \frac{C_i - 1}{2} \\
\frac{i}{3} &\geq \frac{\text{BLdim}(\mathcal{H}_i)}{4C_i \log C_i}
\end{aligned}$$

Therefore, we have  $\text{BLdim}(\mathcal{H}_i) \leq \frac{4i(2i+1)}{9} \log\left(\frac{2i+1}{3}\right)$ , which is finite. So,  $\mathcal{H}_i$  is a bandit Littlestone class for all  $i$ , which implies that  $\mathcal{H}$  can be represented as a countable union of bandit Littlestone classes. That finishes the proof.  $\square$

## C Examples

In this section, we provide three examples of hypothesis classes revealing separations between related learnability notions. The main innovation is constructing the first example. The second example is based on the work of Bousquet et al. [2021]. Also, the third example uses ideas from the second example.

**Proposition C.1** (Uniform Multiclass Online Learnable **but not** Non-Uniform Multiclass PAC Learnable under Bandit Feedback). *There exists a hypothesis class  $\mathcal{H} \subseteq \mathcal{Y}^{\mathcal{X}}$  such that can be represented as a countable union of classes with finite Littlestone dimension, but cannot be represented as a countable union of classes with finite effective label space.*

*Proof.* Let  $\mathcal{X}$  be the set of all non-empty countable sequences of distinct real numbers. Also, let  $\mathcal{Y} = \mathbb{N} \cup \{\star\}$ . In addition, let  $\mathcal{H} = \{h_y \mid h_y : \mathcal{X} \rightarrow \mathcal{Y}, y \in \mathbb{R}, \forall_{S \in \mathcal{X}} h_y(S) = \star \text{ if } y \text{ isn't in the sequence } S; \text{ otherwise } h_y(S) = i, \text{ where } S_i = y\}$ . First, we claim that  $\mathcal{H}$  cannot be represented as a countable union of classes with finite effective label space. Suppose by contradiction that  $\mathcal{H} = \bigcup_{i=1}^{\infty} \mathcal{H}_i$  such that for every  $i \in \mathbb{N}$ , we have: the effective label space of  $\mathcal{H}_i$  is finite. Then, there exists  $i^* \in \mathbb{N}$  such that  $|\mathcal{H}_{i^*}| = \infty$ . This is because  $\mathcal{H}$  is uncountable as  $\mathbb{R}$  is uncountable. Now, we claim that the effective label space of  $\mathcal{H}_{i^*}$  is infinite. To see this, let  $\mathcal{H}' = \{h_{z_1}, h_{z_2}, \dots\} \subseteq \mathcal{H}_{i^*}$  such that  $\mathcal{H}'$  is countable. Based on that, let  $S' = (z_1, z_2, \dots)$ . Then, observe that the set  $\{y \mid y \in \mathbb{R}, \exists_{h \in \mathcal{H}'} h(S') = y\}$  is infinite. As a result, we should have: the effective label space of  $\mathcal{H}_{i^*}$  is infinite. This is a contradiction. Second, we claim that  $\text{Ldim}(\mathcal{H}) = 1$ . To show this, we prove that the following online learning algorithm makes at most one mistake against any realizable adversary. The algorithm predicts  $\star$  until the first mistake, after which there is only one concept consistent with the true label. This is because if the mistake was made on  $(S, i)$ , then the target function is  $h_z$ , where  $z = S_i$ . This finishes the proof.  $\square$

**Proposition C.2** (Universal Multiclass Online Learnable under Bandit Feedback **but not** Non-Uniform Multiclass PAC Learnable). *There exists a hypothesis class  $\mathcal{H} \subseteq \mathcal{Y}^{\mathcal{X}}$  such that it does not have an infinite Littlestone tree, but cannot be represented as a countable union of classes with finite VC dimension.*

*Proof.* Let  $\mathcal{X} = \{S \mid S \subset \mathbb{R}, |S| < \infty\}$ . Also, let  $\mathcal{Y} = \{0, 1\}$ . In addition, let  $\mathcal{H} = \{h_y \mid h_y : \mathcal{X} \rightarrow \mathcal{Y}, y \in \mathbb{R}, \forall_{S \in \mathcal{X}} h_y(S) = \mathbb{I}[y \in S]\}$ . First, we claim that  $\mathcal{H}$  cannot be represented as a countable union of classes with finite VC dimension. Suppose by contradiction that  $\mathcal{H} = \bigcup_{i=1}^{\infty} \mathcal{H}_i$  such that for every  $i \in \mathbb{N}$ , we have:  $\text{VC}(\mathcal{H}_i) < \infty$ . Then, there exists  $i^* \in \mathbb{N}$  such that  $|\mathcal{H}_{i^*}| = \infty$ . This is because  $\mathcal{H}$  is uncountable as  $\mathbb{R}$  is uncountable. Now, we claim that  $\text{VC}(\mathcal{H}_{i^*}) = \infty$ . This is because the dual class of  $\mathcal{H}_{i^*}$  is the class of all finite subsets of an uncountable set. In particular, note that for every hypothesis class  $\mathcal{H}' \subseteq \{0, 1\}^{\mathcal{X}'}$ , we have:  $\text{VC}(\mathcal{H}') < \infty$  if and only if  $\text{VC}^*(\mathcal{H}') < \infty$ . This is a contradiction. Second, we claim that  $\mathcal{H}$  does not have an infinite Littlestone tree. This is because once we fix a root  $S \in \mathcal{X}$  of a Littlestone tree, the class  $\{h \mid h \in \mathcal{H}, h(S) = 1\}$  is finite, so the corresponding subtree must also be finite. This finishes the proof.  $\square$

**Proposition C.3** (Non-Uniform Multiclass Online Learnable under Bandit Feedback **but not** Uniform Multiclass PAC Learnable). *There exists a hypothesis class  $\mathcal{H} \subseteq \mathcal{Y}^{\mathcal{X}}$  such that it can be represented as a countable union of classes with finite bandit Littlestone dimension, but  $\text{VC}(\mathcal{H}) = \infty$ .*

*Proof.* Let  $\mathcal{X} = \{S \mid S \subset \mathbb{N}, |S| < \infty\}$ . Also, let  $\mathcal{Y} = \{0, 1\}$ . In addition, let  $\mathcal{H} = \{h_y \mid h_y : \mathcal{X} \rightarrow \mathcal{Y}, y \in \mathbb{N}, \forall_{S \in \mathcal{X}} h_y(S) = \mathbb{I}[y \in S]\}$ . First, we claim that  $\text{VC}(\mathcal{H}) = \infty$ . This is because the dual class of  $\mathcal{H}$  is the class of all finite subsets of  $\mathbb{N}$ . In particular, note that for every hypothesis class  $\mathcal{H}' \subseteq \{0, 1\}^{\mathcal{X}'}$ , we have:  $\text{VC}(\mathcal{H}') < \infty$  if and only if  $\text{VC}^*(\mathcal{H}') < \infty$ . Second, we claim that  $\mathcal{H}$  can be represented as a countable union of classes with finite bandit Littlestone dimension. This is because  $\mathcal{H}$  is countable. In particular, note that each single hypothesis has both Littlestone dimension and bandit Littlestone dimension equal to zero. This finishes the proof.  $\square$

We note that, above, we use  $VC^*(\cdot)$  as the dual VC dimension. We refer the readers to the work of Assouad [1983] for the proof of the result that we used.

## D Non-Uniform Multiclass PAC Learning

In this section, we investigate the non-uniform PAC multiclass learning. Basically, we combine the tools from the work of Benedek and Itai [1988] and the work of Brukhim et al. [2022] to get a non-uniform PAC learner.

First, we have the following property of the DS dimension.

**Lemma D.1.** *If  $d_{DS}(\mathcal{H}_1) = d_1$ ,  $d_{DS}(\mathcal{H}_2) = d_2$ ,  $d_{DS}(\mathcal{H}_1 \cup \mathcal{H}_2) \leq d_1 + d_2 + 1$ .*

*Proof.* We can prove this by contradiction. Suppose  $d_{DS}(\mathcal{H}_1 \cup \mathcal{H}_2) \geq d_1 + d_2 + 2$ . We have  $S = \{x_1, \dots, x_{d_1+d_2+2}\}$ , such that  $\mathcal{H}|_S$  contains a  $d_1 + d_2 + 2$ -dimension pseudo-cube. Without loss of generality, assume  $S_1 = \{x_1, \dots, x_{d_1}\}$  such that  $\mathcal{H}|_{S_1}$  contains a  $d_1$ -dimension pseudo-cube. However, for any  $i = d_1 + 1, \dots, d_1 + d_2 + 2$ , let  $S'_1 = S_1 \cup \{x_i\}$ , then  $\mathcal{H}|_{S'_1}$  does not contain a  $d_1 + 1$  pseudo-cube. Therefore, for all  $h \in \mathcal{H}_1$ , they all agrees on the label of  $S_2 = \{x_{d_1+1}, \dots, x_{d_1+d_2+2}\}$ . However,  $\mathcal{H}|_{S_2}$  contains a  $d_2 + 2$  dimension pseudo-cube. Therefore,  $\mathcal{H}_2|_{S_2} = \mathcal{H}|_{S_2} \setminus \mathcal{H}_1|_{S_2}$ , which must contains a  $d_2 + 1$ -dimension pseudo cube. Here is a contradiction, and that finishes the proof.  $\square$

In order to prove the main theorem in this section, Theorem 1.3. We need the following results about the uniform PAC learnability with bandit feedback.

**Theorem D.2** ([Brukhim et al., 2022]). *Let  $\mathcal{H} \subseteq \mathcal{Y}^{\mathcal{X}}$  be a hypothesis class.  $\mathcal{H}$  is uniformly PAC learnable, if and only if  $\mathcal{H}$  has finite DS dimension.*

Then we have the main theorem here.

**Theorem D.3.** *The following three statements are equivalent:*

- $\mathcal{H}$  can be represented as a countable union of hypothesis classes whose DS dimension is finite.
- $\mathcal{H}$  is non-uniform PAC learnable in the realizable setting.
- $\mathcal{H}$  is non-uniform PAC learnable in the agnostic setting.

Recall the proof of Theorem 1.3, we only need Lemma D.1, and the rest of the proof is exactly the same.

## E Non-Uniform Multiclass Adversarial Online Learning

In this section, we provide the results for non-uniform multiclass online learning with full supervision. The results here are new, but can easily be obtained by extending the methods in the work of Lu [2024].

### E.1 Realizable Setting

In the realizable setting, a concept class  $\mathcal{H}$  is non-uniformly online learnable, if and only if  $\mathcal{H}$  is a countable union of Littlestone classes. The proof extends the algorithm from the work of Lu [2024] to a multiclass setting. Formally,

**Theorem E.1.** *The following two statements are equivalent:*

- $\mathcal{H}$  is non-uniform online learnable with full supervision.
- $\mathcal{H}$  can be represented as a countable union of Littlestone classes.

*Proof.* We first prove that if  $\mathcal{H}$  can be represented as a countable union of Littlestone classes, then  $\mathcal{H}$  is non-uniform online learnable with full supervision by using the following non-uniform online



---

**Algorithm 2** Non-uniform Online Learning Algorithm with Full Supervision

---

```
1: Input: A concept class  $\mathcal{H} = \bigcup_{n \in \mathbb{N}^+} \mathcal{H}_n$  with  $d_n = \text{Ldim}(\mathcal{H}_n) < \infty, \forall n \in \mathbb{N}^+$ .  
2: Initialize an SOA  $\mathbf{A}_n$  for each bandit Littlestone class  $\mathcal{H}_n$ , and number of mistakes for each  
   algorithm  $e_n = 0$ .  
3: for  $t = 1, 2, \dots$  do  
4:   Receive instance  $X_t$ .  
5:   Compute  $J_t = \arg \min_n \{e_n + n\}$ .  
6:   Predict  $\hat{Y}_t$  as  $\mathbf{A}_{J_t}$ .  
7:   Receive true label  $Y_t$ .  
8:   for  $n = 1, 2, \dots$  do  
9:     if The prediction of  $\mathbf{A}_n$  is not equal to  $Y_t$  then  
10:       $e_n = e_n + 1$ .  
11:     end if  
12:   end for  
13: end for
```

---

693 learning algorithm (Algorithm 2). Recall that the SOA algorithm has a mistake bound of  $d$  for a  
694 Littlestone class  $\mathcal{H}$  with  $\text{Ldim}(\mathcal{H}) = d$ . Then if the target concept  $h^* \in \mathcal{H}_k$ , where  $\text{Ldim}(\mathcal{H}_k) = d_k$ .  
695 Then notice that for all  $t$ , we have  $J_t \leq d_k + k$ . Thus, the algorithm will stick to the  $\mathbf{A}_k$  after at most  
696  $(d_k + k)^2$  rounds and will make no more mistakes. So we have  $m(h^*) \leq (d_k + k)^2$  and that finishes  
697 the proof of the first part.

698 Then we prove that if  $\mathcal{H}$  is non-uniform online learnable with full supervision, then  $\mathcal{H}$  can be  
699 represented as a countable union of Littlestone classes. Because  $\mathcal{H}$  is non-uniform online learn-  
700 able with full supervision, there exists an online learning algorithm  $\mathbf{A}$  such that for all  $h^* \in \mathcal{H}$ ,  
701  $\mathbf{M}_{\mathbf{A}}(h^*, X) \leq m(h^*)$ . Then we can define

$$\mathcal{H}_n = \{h \in \mathcal{H} : m(h) = n\}.$$

702 Because  $\mathcal{H}$  is non-uniform online learnable with full supervision, we know that for every  $h \in \mathcal{H}$ ,  
703  $m(h)$  is finite, and we can assume that the learning algorithm is  $\mathbf{A}$ . Thus,  $\mathcal{H} = \bigcup_{n \in \mathbb{N}^+} \mathcal{H}_n$ . We then  
704 prove that  $\mathcal{H}_n$  is a Littlestone class. In order to do this, we need the result from the work of Daniely  
705 et al. [2011] that any deterministic algorithm makes at least  $\text{Ldim}(\mathcal{H})$  mistakes against the worst  
706 adversary for concept class  $\mathcal{H}$ . Notice that for any concept  $h^* \in \mathcal{H}_n$ ,  $\mathbf{A}$  can learn it with at most  $n$   
707 mistakes, thus,  $\text{Ldim}(\mathcal{H}_n) \leq n$ . Therefore,  $\mathcal{H}_n$  is a Littlestone class. That finishes the proof.  $\square$

## 708 E.2 Agnostic Setting

709 In the agnostic setting, a concept class  $\mathcal{H}$  is non-uniformly online learnable, if and only if  $\mathcal{H}$  is a  
710 countable union of Littlestone classes. We use the doubling trick on the uniform online learning  
711 algorithm to show this result. Formally,

712 **Theorem E.2.** *The following two statements are equivalent:*

- 713 •  $\mathcal{H}$  is non-uniform online learnable with full supervision in the agnostic setting.
- 714 •  $\mathcal{H}$  can be represented as a countable union of Littlestone classes.

715 In order to prove this theorem, we need the uniform online learning algorithm in the agnostic setting  
716 and the following theorem from the work of Hanneke et al. [2023].

717 **Theorem E.3** ([Hanneke et al., 2023], Theorem 4). *For any concept class  $\mathcal{H}$  and  $T > 2\text{Ldim}(\mathcal{H})$ ,  
718 we have an agnostic online learning algorithm, whose regret is at most*

$$O(\sqrt{\text{Ldim}(\mathcal{H})T \log T}).$$

719 We can use the doubling trick and the uniform online learning algorithm above to design the non-  
720 uniform online learning algorithm. To do this, we need to notice that the property of having a  
721 finite Littlestone dimension is closed under finite union. This is true due to the same reasoning as  
722 Lemma B.4. Then we can prove Theorem E.2.

723 *Proof.* We first show that if  $\mathcal{H}$  can be represented as a countable union of Littlestone classes,  $\mathcal{H}$  is  
 724 non-uniform online learnable in the agnostic setting. Because  $\mathcal{H}$  can be represented as a countable  
 725 union of Littlestone classes, we can write  $\mathcal{H} = \bigcup_{i=1}^{\infty} \mathcal{H}_i$ , such that  $\text{Ldim}(\bigcup_{i=1}^k \mathcal{H}_i) \leq k$ . Let  
 726  $T_k = \sum_{j=1}^k 2^{j-1}$ . Run the uniform agnostic online learning algorithm on  $\bigcup_{i=1}^k \mathcal{H}_i$  in time slot  
 727  $[T_k + 1, T_{k+1}]$ , we restart the algorithm at time  $T_k + 1$  for every  $k$ .

728 Notice that for every  $h^*$ , there is a  $k$  such that  $h^* \in \mathcal{H}_k$ , and use Theorem E.3, we can analyze the  
 729 regret of the algorithm above:

$$\begin{aligned}
 \text{regret}_{\mathbf{A}}(h^*, X, Y, T) &= \mathbb{E} \left[ \sum_{t=1}^T \mathbb{I}[\hat{Y}_t \neq Y_t] - \sum_{t=1}^T \mathbb{I}[h^*(X_t) \neq Y_t] \right] \\
 &= \sum_{j=1}^{\log T} \mathbb{E} \left[ \sum_{t=T_j+1}^{T_{j+1}} \mathbb{I}[\hat{Y}_t \neq Y_t] - \sum_{t=T_j+1}^{T_{j+1}} \mathbb{I}[h^*(X_t) \neq Y_t] \right] \\
 &\leq T_k + \sum_{j=k}^{\lfloor \log T \rfloor} \mathbb{E} \left[ \sum_{t=T_j+1}^{T_{j+1}} \mathbb{I}[\hat{Y}_t \neq Y_t] - \mathbb{I}[h^*(X_t) \neq Y_t] \right] + \mathbb{E} \left[ \sum_{t=T_{\lfloor \log T \rfloor}+1}^T \mathbb{I}[\hat{Y}_t \neq Y_t] - \mathbb{I}[h^*(X_t) \neq Y_t] \right] \\
 &\leq T_k + \sum_{j=k}^{\lfloor \log T \rfloor} c \sqrt{\text{Ldim} \left( \bigcup_{i=1}^j \mathcal{H}_i \right) j 2^j} + c \sqrt{\text{Ldim} \left( \bigcup_{i=1}^{\lfloor \log T \rfloor + 1} \mathcal{H}_i \right) (T - 2^{\lfloor \log T \rfloor}) \log(T - 2^{\lfloor \log T \rfloor})} \\
 &\leq T_k + \sum_{j=k}^{\lfloor \log T \rfloor} c j \sqrt{2^j} + c(\lfloor \log T \rfloor + 1) \sqrt{(T - 2^{\lfloor \log T \rfloor})} \\
 &\leq T_k + c(\lfloor \log T \rfloor + 1)^2 \sqrt{T}
 \end{aligned}$$

730 This inequality holds for some constant  $c$ . Thus, we notice that  $m(h^*, T) = T_k + c(\log T)^2 \sqrt{T}$ ,  
 731 which is  $o(T)$ . Therefore, this is a non-uniform agnostic online learning algorithm.

732 To prove the necessity, it is equivalent to show that if there is a non-uniform online learner  $\mathbf{A}$  can  
 733 learn a concept class  $\mathcal{H}$  with expected mistake bound  $m(h, T) = o(T)$ ,  $\mathcal{H}$  can be represented as a  
 734 countable union of Littlestone classes.

735 By definition, we define

$$\mathcal{H}_i = \{h \in \mathcal{H} : \forall X, \forall T \geq i, \mathbb{E}[\mathbf{M}_{\mathbf{A}}(h, X, T)] \leq \frac{T}{3}\}.$$

736 Notice that  $i \in \mathbb{N}$  and  $\mathcal{H} = \bigcup_{i=1}^{\infty} \mathcal{H}_i$ . Referring to the work of Ben-David et al. [2009], we know  
 737 there exists a sequence  $X$ , such that  $\mathbb{E}[\mathbf{M}_{\mathbf{A}}(h, X, T)] \geq \frac{\text{Ldim}(\mathcal{H}_i)}{2}$  for all algorithm  $\mathbf{A}$ . Then we take  
 738  $T = i$ , we can get  $\frac{i}{3} \geq \frac{\text{Ldim}(\mathcal{H}_i)}{2}$ . Thus,  $\text{Ldim}(\mathcal{H}_i) \leq \frac{2i}{3}$ , which is finite. So,  $\mathcal{H}_i$  is a Littlestone class  
 739 for all  $i$ , which implies that  $\mathcal{H}$  can be represented as a countable union of Littlestone classes. That  
 740 finishes the proof.  $\square$

## NeurIPS Paper Checklist

### 1. Claims

Question: Do the main claims made in the abstract and introduction accurately reflect the paper's contributions and scope?

Answer: [\[Yes\]](#)

Justification: In the abstract and introduction, we claim that we provide a combinatorial characterization of learnable hypothesis classes in both models, in the realizable and agnostic settings, within the non-uniform learning framework, and we construct some examples of concept classes showing separations. We prove these results in the subsequent sections.

Guidelines:

- The answer NA means that the abstract and introduction do not include the claims made in the paper.
- The abstract and/or introduction should clearly state the claims made, including the contributions made in the paper and important assumptions and limitations. A No or NA answer to this question will not be perceived well by the reviewers.
- The claims made should match theoretical and experimental results, and reflect how much the results can be expected to generalize to other settings.
- It is fine to include aspirational goals as motivation as long as it is clear that these goals are not attained by the paper.

### 2. Limitations

Question: Does the paper discuss the limitations of the work performed by the authors?

Answer: [\[Yes\]](#)

Justification: This is discussed in section 6.

Guidelines:

- The answer NA means that the paper has no limitation while the answer No means that the paper has limitations, but those are not discussed in the paper.
- The authors are encouraged to create a separate "Limitations" section in their paper.
- The paper should point out any strong assumptions and how robust the results are to violations of these assumptions (e.g., independence assumptions, noiseless settings, model well-specification, asymptotic approximations only holding locally). The authors should reflect on how these assumptions might be violated in practice and what the implications would be.
- The authors should reflect on the scope of the claims made, e.g., if the approach was only tested on a few datasets or with a few runs. In general, empirical results often depend on implicit assumptions, which should be articulated.
- The authors should reflect on the factors that influence the performance of the approach. For example, a facial recognition algorithm may perform poorly when image resolution is low or images are taken in low lighting. Or a speech-to-text system might not be used reliably to provide closed captions for online lectures because it fails to handle technical jargon.
- The authors should discuss the computational efficiency of the proposed algorithms and how they scale with dataset size.
- If applicable, the authors should discuss possible limitations of their approach to address problems of privacy and fairness.
- While the authors might fear that complete honesty about limitations might be used by reviewers as grounds for rejection, a worse outcome might be that reviewers discover limitations that aren't acknowledged in the paper. The authors should use their best judgment and recognize that individual actions in favor of transparency play an important role in developing norms that preserve the integrity of the community. Reviewers will be specifically instructed to not penalize honesty concerning limitations.

### 3. Theory assumptions and proofs

Question: For each theoretical result, does the paper provide the full set of assumptions and a complete (and correct) proof?

Answer: [Yes]

Justification: We make all of the assumptions clear in section 3. Also, the paper contains complete proof in the subsequent sections.

Guidelines:

- The answer NA means that the paper does not include theoretical results.
- All the theorems, formulas, and proofs in the paper should be numbered and cross-referenced.
- All assumptions should be clearly stated or referenced in the statement of any theorems.
- The proofs can either appear in the main paper or the supplemental material, but if they appear in the supplemental material, the authors are encouraged to provide a short proof sketch to provide intuition.
- Inversely, any informal proof provided in the core of the paper should be complemented by formal proofs provided in appendix or supplemental material.
- Theorems and Lemmas that the proof relies upon should be properly referenced.

#### 4. Experimental result reproducibility

Question: Does the paper fully disclose all the information needed to reproduce the main experimental results of the paper to the extent that it affects the main claims and/or conclusions of the paper (regardless of whether the code and data are provided or not)?

Answer: [NA]

Justification: This paper is purely theoretical.

Guidelines:

- The answer NA means that the paper does not include experiments.
- If the paper includes experiments, a No answer to this question will not be perceived well by the reviewers: Making the paper reproducible is important, regardless of whether the code and data are provided or not.
- If the contribution is a dataset and/or model, the authors should describe the steps taken to make their results reproducible or verifiable.
- Depending on the contribution, reproducibility can be accomplished in various ways. For example, if the contribution is a novel architecture, describing the architecture fully might suffice, or if the contribution is a specific model and empirical evaluation, it may be necessary to either make it possible for others to replicate the model with the same dataset, or provide access to the model. In general, releasing code and data is often one good way to accomplish this, but reproducibility can also be provided via detailed instructions for how to replicate the results, access to a hosted model (e.g., in the case of a large language model), releasing of a model checkpoint, or other means that are appropriate to the research performed.
- While NeurIPS does not require releasing code, the conference does require all submissions to provide some reasonable avenue for reproducibility, which may depend on the nature of the contribution. For example
  - (a) If the contribution is primarily a new algorithm, the paper should make it clear how to reproduce that algorithm.
  - (b) If the contribution is primarily a new model architecture, the paper should describe the architecture clearly and fully.
  - (c) If the contribution is a new model (e.g., a large language model), then there should either be a way to access this model for reproducing the results or a way to reproduce the model (e.g., with an open-source dataset or instructions for how to construct the dataset).
  - (d) We recognize that reproducibility may be tricky in some cases, in which case authors are welcome to describe the particular way they provide for reproducibility. In the case of closed-source models, it may be that access to the model is limited in some way (e.g., to registered users), but it should be possible for other researchers to have some path to reproducing or verifying the results.

#### 5. Open access to data and code

Question: Does the paper provide open access to the data and code, with sufficient instructions to faithfully reproduce the main experimental results, as described in supplemental material?

Answer: [NA]

Justification: This paper is purely theoretical.

Guidelines:

- The answer NA means that paper does not include experiments requiring code.
- Please see the NeurIPS code and data submission guidelines (<https://nips.cc/public/guides/CodeSubmissionPolicy>) for more details.
- While we encourage the release of code and data, we understand that this might not be possible, so “No” is an acceptable answer. Papers cannot be rejected simply for not including code, unless this is central to the contribution (e.g., for a new open-source benchmark).
- The instructions should contain the exact command and environment needed to run to reproduce the results. See the NeurIPS code and data submission guidelines (<https://nips.cc/public/guides/CodeSubmissionPolicy>) for more details.
- The authors should provide instructions on data access and preparation, including how to access the raw data, preprocessed data, intermediate data, and generated data, etc.
- The authors should provide scripts to reproduce all experimental results for the new proposed method and baselines. If only a subset of experiments are reproducible, they should state which ones are omitted from the script and why.
- At submission time, to preserve anonymity, the authors should release anonymized versions (if applicable).
- Providing as much information as possible in supplemental material (appended to the paper) is recommended, but including URLs to data and code is permitted.

## 6. Experimental setting/details

Question: Does the paper specify all the training and test details (e.g., data splits, hyper-parameters, how they were chosen, type of optimizer, etc.) necessary to understand the results?

Answer: [NA]

Justification: This paper is purely theoretical.

Guidelines:

- The answer NA means that the paper does not include experiments.
- The experimental setting should be presented in the core of the paper to a level of detail that is necessary to appreciate the results and make sense of them.
- The full details can be provided either with the code, in appendix, or as supplemental material.

## 7. Experiment statistical significance

Question: Does the paper report error bars suitably and correctly defined or other appropriate information about the statistical significance of the experiments?

Answer: [NA]

Justification: This paper is purely theoretical.

Guidelines:

- The answer NA means that the paper does not include experiments.
- The authors should answer "Yes" if the results are accompanied by error bars, confidence intervals, or statistical significance tests, at least for the experiments that support the main claims of the paper.
- The factors of variability that the error bars are capturing should be clearly stated (for example, train/test split, initialization, random drawing of some parameter, or overall run with given experimental conditions).
- The method for calculating the error bars should be explained (closed form formula, call to a library function, bootstrap, etc.)

- The assumptions made should be given (e.g., Normally distributed errors).
- It should be clear whether the error bar is the standard deviation or the standard error of the mean.
- It is OK to report 1-sigma error bars, but one should state it. The authors should preferably report a 2-sigma error bar than state that they have a 96% CI, if the hypothesis of Normality of errors is not verified.
- For asymmetric distributions, the authors should be careful not to show in tables or figures symmetric error bars that would yield results that are out of range (e.g. negative error rates).
- If error bars are reported in tables or plots, The authors should explain in the text how they were calculated and reference the corresponding figures or tables in the text.

## 8. Experiments compute resources

Question: For each experiment, does the paper provide sufficient information on the computer resources (type of compute workers, memory, time of execution) needed to reproduce the experiments?

Answer: [NA]

Justification: This paper is purely theoretical.

Guidelines:

- The answer NA means that the paper does not include experiments.
- The paper should indicate the type of compute workers CPU or GPU, internal cluster, or cloud provider, including relevant memory and storage.
- The paper should provide the amount of compute required for each of the individual experimental runs as well as estimate the total compute.
- The paper should disclose whether the full research project required more compute than the experiments reported in the paper (e.g., preliminary or failed experiments that didn't make it into the paper).

## 9. Code of ethics

Question: Does the research conducted in the paper conform, in every respect, with the NeurIPS Code of Ethics <https://neurips.cc/public/EthicsGuidelines>?

Answer: [Yes]

Justification: We have reviewed the NeurIPS Code of Ethics and ensured that our paper conforms, in every respect, with the NeurIPS Code of Ethics. We have also made sure to preserve anonymity.

Guidelines:

- The answer NA means that the authors have not reviewed the NeurIPS Code of Ethics.
- If the authors answer No, they should explain the special circumstances that require a deviation from the Code of Ethics.
- The authors should make sure to preserve anonymity (e.g., if there is a special consideration due to laws or regulations in their jurisdiction).

## 10. Broader impacts

Question: Does the paper discuss both potential positive societal impacts and negative societal impacts of the work performed?

Answer: [NA]

Justification: As this paper is completely theoretical in nature, there does not seem to be any societal impact of the work performed.

Guidelines:

- The answer NA means that there is no societal impact of the work performed.
- If the authors answer NA or No, they should explain why their work has no societal impact or why the paper does not address societal impact.

- Examples of negative societal impacts include potential malicious or unintended uses (e.g., disinformation, generating fake profiles, surveillance), fairness considerations (e.g., deployment of technologies that could make decisions that unfairly impact specific groups), privacy considerations, and security considerations.
- The conference expects that many papers will be foundational research and not tied to particular applications, let alone deployments. However, if there is a direct path to any negative applications, the authors should point it out. For example, it is legitimate to point out that an improvement in the quality of generative models could be used to generate deepfakes for disinformation. On the other hand, it is not needed to point out that a generic algorithm for optimizing neural networks could enable people to train models that generate Deepfakes faster.
- The authors should consider possible harms that could arise when the technology is being used as intended and functioning correctly, harms that could arise when the technology is being used as intended but gives incorrect results, and harms following from (intentional or unintentional) misuse of the technology.
- If there are negative societal impacts, the authors could also discuss possible mitigation strategies (e.g., gated release of models, providing defenses in addition to attacks, mechanisms for monitoring misuse, mechanisms to monitor how a system learns from feedback over time, improving the efficiency and accessibility of ML).

## 11. Safeguards

Question: Does the paper describe safeguards that have been put in place for responsible release of data or models that have a high risk for misuse (e.g., pretrained language models, image generators, or scraped datasets)?

Answer: [NA]

Justification: This paper is theoretical and poses no such risks.

Guidelines:

- The answer NA means that the paper poses no such risks.
- Released models that have a high risk for misuse or dual-use should be released with necessary safeguards to allow for controlled use of the model, for example by requiring that users adhere to usage guidelines or restrictions to access the model or implementing safety filters.
- Datasets that have been scraped from the Internet could pose safety risks. The authors should describe how they avoided releasing unsafe images.
- We recognize that providing effective safeguards is challenging, and many papers do not require this, but we encourage authors to take this into account and make a best faith effort.

## 12. Licenses for existing assets

Question: Are the creators or original owners of assets (e.g., code, data, models), used in the paper, properly credited and are the license and terms of use explicitly mentioned and properly respected?

Answer: [NA]

Justification: This paper does not use existing assets.

Guidelines:

- The answer NA means that the paper does not use existing assets.
- The authors should cite the original paper that produced the code package or dataset.
- The authors should state which version of the asset is used and, if possible, include a URL.
- The name of the license (e.g., CC-BY 4.0) should be included for each asset.
- For scraped data from a particular source (e.g., website), the copyright and terms of service of that source should be provided.
- If assets are released, the license, copyright information, and terms of use in the package should be provided. For popular datasets, [paperswithcode.com/datasets](https://paperswithcode.com/datasets) has curated licenses for some datasets. Their licensing guide can help determine the license of a dataset.

- For existing datasets that are re-packaged, both the original license and the license of the derived asset (if it has changed) should be provided.
- If this information is not available online, the authors are encouraged to reach out to the asset's creators.

### 13. New assets

Question: Are new assets introduced in the paper well documented and is the documentation provided alongside the assets?

Answer: [NA]

Justification: This paper does not release new assets.

Guidelines:

- The answer NA means that the paper does not release new assets.
- Researchers should communicate the details of the dataset/code/model as part of their submissions via structured templates. This includes details about training, license, limitations, etc.
- The paper should discuss whether and how consent was obtained from people whose asset is used.
- At submission time, remember to anonymize your assets (if applicable). You can either create an anonymized URL or include an anonymized zip file.

### 14. Crowdsourcing and research with human subjects

Question: For crowdsourcing experiments and research with human subjects, does the paper include the full text of instructions given to participants and screenshots, if applicable, as well as details about compensation (if any)?

Answer: [NA]

Justification: This paper does not involve crowdsourcing nor research with human subjects.

Guidelines:

- The answer NA means that the paper does not involve crowdsourcing nor research with human subjects.
- Including this information in the supplemental material is fine, but if the main contribution of the paper involves human subjects, then as much detail as possible should be included in the main paper.
- According to the NeurIPS Code of Ethics, workers involved in data collection, curation, or other labor should be paid at least the minimum wage in the country of the data collector.

### 15. Institutional review board (IRB) approvals or equivalent for research with human subjects

Question: Does the paper describe potential risks incurred by study participants, whether such risks were disclosed to the subjects, and whether Institutional Review Board (IRB) approvals (or an equivalent approval/review based on the requirements of your country or institution) were obtained?

Answer: [NA]

Justification: This paper does not involve crowdsourcing nor research with human subjects.

Guidelines:

- The answer NA means that the paper does not involve crowdsourcing nor research with human subjects.
- Depending on the country in which research is conducted, IRB approval (or equivalent) may be required for any human subjects research. If you obtained IRB approval, you should clearly state this in the paper.
- We recognize that the procedures for this may vary significantly between institutions and locations, and we expect authors to adhere to the NeurIPS Code of Ethics and the guidelines for their institution.
- For initial submissions, do not include any information that would break anonymity (if applicable), such as the institution conducting the review.



1054 **16. Declaration of LLM usage**

1055 Question: Does the paper describe the usage of LLMs if it is an important, original, or

1056 non-standard component of the core methods in this research? Note that if the LLM is used

1057 only for writing, editing, or formatting purposes and does not impact the core methodology,

1058 scientific rigorousness, or originality of the research, declaration is not required.

1059 Answer: [NA]

1060 Justification: We only use LLM for writing, and editing purposes.

1061 Guidelines:

1062 • The answer NA means that the core method development in this research does not

1063 involve LLMs as any important, original, or non-standard components.

1064 • Please refer to our LLM policy (<https://neurips.cc/Conferences/2025/LLM>)

1065 for what should or should not be described.
